# Supplementary material for: Co3O4–Ag photocatalysts for the efficient degradation of methyl orange
Source: Royal Society of Chemistry journal article supplement (doi:10.1039/c9ra10437b), 2020-01-01
Supplement: c9ra10437b1.pdf [file c9ra10437b1.pdf]

## Co<sub>3</sub>O<sub>4</sub>-Ag compound system for efficient methylene orange

### degradation

Hongmei Chen<sup>1</sup>, Chenyang Xue<sup>1,\*</sup>, Danfeng Cui<sup>1</sup>, Maoxing Liu<sup>2</sup>, Yi Chen<sup>1</sup>, Yuankai Li<sup>1</sup>, Wendong Zhang<sup>1,\*</sup>

<sup>1</sup>Science and Technology on Electronic Test and Measurement Laboratory, North University of China, Taiyuan, Shanxi 030051, China

<sup>2</sup>Department of Mathematics, Qingdao University of Science and Technology, Qingdao, 266061, China

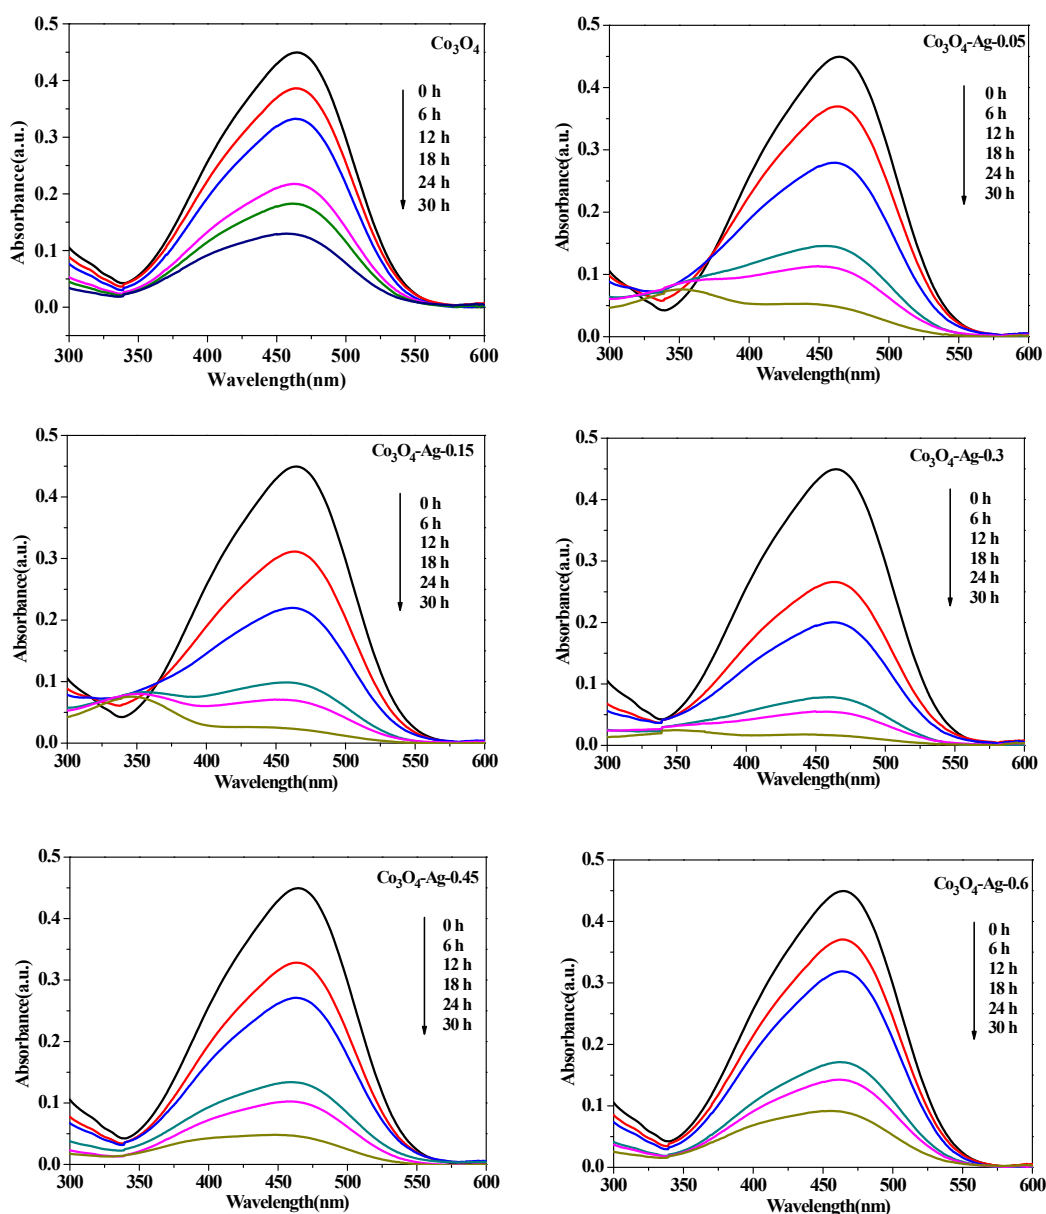

**Fig.S1** Irradiation time-dependent UV-vis absorbance spectra of MO aqueous solution for different photocatalysts

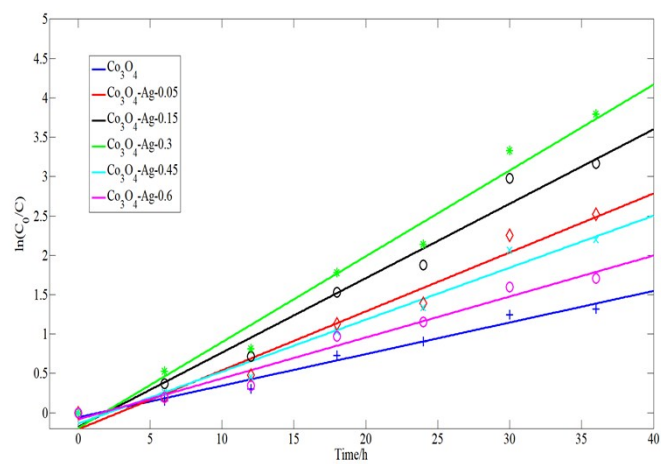

**Fig.S2** The first order plot of MO degradation for all the photocatalysts
